# Supplementary material for: Shear dynamics of confined membranes
Source: Royal Society of Chemistry journal article supplement (doi:10.1039/d1sm00322d), 2021-01-01
Supplement: d1sm00322d8.pdf [file d1sm00322d8.pdf]

# Shear dynamics of confined membranes: Electronic Supplementary Information

Thomas Le Goff

*Aix-Marseille Univ, CNRS, IBDM, Turing Centre for Living System, Marseille, France.*

Tung B.T. To

*Instituto de Física, Universidade Federal Fluminense,  
Avenida Litorânea s/n, 24210-340 Niterói RJ, Brazil.*

Olivier Pierre-Louis

*Institut Lumière Matière, UMR5306 Université Lyon 1-CNRS,  
Université de Lyon, 69622 Villeurbanne, France.\**

(Dated: March 1, 2021)

---

\* Olivier.Pierre-Louis@univ-lyon1.fr

## Supplementary Movies

The movies show the simulation results for the dynamics of membrane-height profiles (topviews along the  $Z$  direction) with excess area  $\Delta A_*$  and under the shear velocity  $V$ . The steady-state membrane profiles may drift with velocity  $(V_{dX}, V_{dY})$  along the  $(X, Y)$  directions.

**Supplementary Movie 1** – This movie is cited in the text as  $\text{ESI}^\dagger(\text{Movie } 1)$  and has the file name “sm1”. This shows the simulation results for  $V = 0$  and for six values of  $\Delta A_*$ : 0.007495, 0.01186, 0.05999, 0.1503, 0.2462, 0.4062.

**Supplementary Movie 2** – This movie is cited in the text as  $\text{ESI}^\dagger(\text{Movie } 2)$  and has the file name “sm2”. This shows the simulation results for cases which steady-state membrane profiles drift to the right  $V_{dX} > 0$  for six values of  $(\Delta A_*, V)$ : (0.007495, 1), (0.01186, 0.1), (0.1503, 1), (0.1503, 2), (0.1503, 20), (0.2462, 20).

**Supplementary Movie 3** – This movie is cited in the text as  $\text{ESI}^\dagger(\text{Movie } 3)$  and has the file name “sm3”. This shows the simulation results for cases which steady-state membrane profiles drift to the left  $V_{dX} < 0$  for four values of  $(\Delta A_*, V)$ : (0.05999, 5), (0.1503, 2), (0.1503, 30), (0.2462, 5). Note that here the simulation for  $(\Delta A_*, V)=(0.1503, 2)$  has different initial condition with that in Supplementary Movie 2.

**Supplementary Movie 4** – This movie is cited in the text as  $\text{ESI}^\dagger(\text{Movie } 4)$  and has the file name “sm4”. This shows the simulation results for cases which steady-state membrane profiles are frozen  $V_{dX} = V_{dY} = 0$  for two values of  $(\Delta A_*, V)$ : (0.05999, 20), (0.2462, 10).

**Supplementary Movie 5** – This movie is cited in the text as  $\text{ESI}^\dagger(\text{Movie } 5)$  and has the file name “sm5”. This shows the simulation results for the case which the steady-state membrane profile oscillates along the  $X$  direction  $\Delta A_* = 0.1503$  and  $V = 3$ .

**Supplementary Movie 6** – This movie is cited in the text as  $\text{ESI}^\dagger(\text{Movie } 6)$  and has the file name “sm6”. This shows the simulation results for large shear  $V = V_{\text{max}}$  which steady-state membrane profiles are periodic for three values of  $(\Delta A_*, V)$ : (0.007495, 5), (0.01186, 5), (0.1503, 80).

**Supplementary Movie 7** – This movie is cited in the text as  $\text{ESI}^\dagger(\text{Movie } 7)$  and has the file name “sm7”. This shows the simulation results for large membrane  $\Delta A_* = 4.0735$  for seven values of  $V$ : 0, 20, 40, 50, 80, 120, 150.
